# Supplementary material for: Approaches for in silico finishing of microbial genome sequences
Source: PubMed Central journal article supplement (PMC5596377; doi:10.1590/1678-4685-gmb-2016-0230), 2017
Supplement: 1415-4757-gmb-40-03-0553-Suppl01.pdf [file 1415-4757-gmb-40-03-0553-Suppl01.pdf]

## Supplementary material to “Approaches for in silico finishing of microbial genome sequences”

Table S1 - Examples of sequenced microbial genomes for which the tools discussed in the present review were used.

| Organism                         | Tool        | Tool Category               | Sequencing Platform             | Reference                            |
|----------------------------------|-------------|-----------------------------|---------------------------------|--------------------------------------|
| <i>Tannerella forsythia</i>      | MUMmer      | Reference-based scaffolding | Illumina                        | (Stafford <i>et al.</i> , 2016)      |
| Herpesvirus                      | ABACAS      | Reference-based scaffolding | Illumina and Sanger             | (Tweedy <i>et al.</i> , 2015)        |
| <i>Fusarium avenaceum</i>        | ABACAS      | Reference-based scaffolding | 454                             | (Lysøe <i>et al.</i> , 2014)         |
| <i>Brucella abortus</i>          | ABACAS      | Reference-based scaffolding | Illumina                        | (Ledwaba <i>et al.</i> , 2014)       |
| <i>Corynebacterium ulcerans</i>  | CONTIGuator | Reference-based scaffolding | Ion Torrent                     | (Benevides <i>et al.</i> , 2015)     |
| <i>Bacillus pumilus</i>          | CONTIGuator | Reference-based scaffolding | Illumina                        | (de Jong <i>et al.</i> , 2015)       |
| <i>Sacharomyces cerevisiae</i>   | CONTIGuator | Reference-based scaffolding | Illumina                        | (Batista <i>et al.</i> , 2014)       |
| <i>Pseudomonas fluorescens</i>   | Mauve       | Reference-based scaffolding | Illumina                        | (Lo <i>et al.</i> , 2015)            |
| <i>Escherichia coli</i>          | Mauve       | Reference-based scaffolding | Illumina                        | (Galia <i>et al.</i> , 2015)         |
| <i>Pseudomonas simiae</i>        | Mauve       | Reference-based scaffolding | Illumina                        | (Adam <i>et al.</i> , 2015)          |
| <i>Bacillus thuringiensis</i>    | SIS         | Reference-based scaffolding | SOLiD and Illumina              | (Varani <i>et al.</i> , 2013)        |
| <i>Microcystis aeruginosa</i>    | SIS         | Reference-based scaffolding | SOLiD, Ion Torrent and Illumina | (Fiore <i>et al.</i> , 2013)         |
| <i>Pseudomonas</i> sp.           | MeDuSa      | Reference-based scaffolding | Illumina                        | (Presta <i>et al.</i> , 2016)        |
| <i>Burkholderia cepacia</i>      | MeDuSa      | Reference-based scaffolding | Illumina                        | (Miller <i>et al.</i> , 2015)        |
| <i>Actinoplanes</i> sp.          | Ragout      | Reference-based scaffolding | Illumina                        | (Centeno-Leija <i>et al.</i> , 2016) |
| <i>Neisseria meningitidis</i>    | Minimus     | Assembly integration        | Illumina and 454                | (Neri <i>et al.</i> , 2014)          |
| <i>Cellulosimicrobium</i> sp. MM | Minimus     | Assembly integration        | Illumina and 454                | (Sharma <i>et al.</i> , 2014)        |
| <i>Roseibacterium elongatum</i>  | Minimus     | Assembly integration        | Illumina, 454 and Sanger        | (Riedel <i>et al.</i> , 2014)        |
| <i>Rhizobium etli</i>            | MAIA        | Assembly integration        | Illumina                        | (Fauvert <i>et al.</i> , 2011)       |
| <i>Rhizobium</i> sp. UR51a       | CISA        | Assembly integration        | Illumina                        | (de Souza <i>et al.</i> , 2015)      |
| <i>Mycoplasma hyosynoviae</i>    | CISA        | Assembly integration        | Illumina                        | (Bumgardner <i>et al.</i> , 2015)    |
| <i>Xylella fastidiosa</i>        | CISA        | Assembly integration        | Illumina                        | (Giampetruzzi <i>et al.</i> , 2015)  |
| <i>Bacillus niacin</i>           | Mix         | Assembly integration        | Illumina                        | (Harvey and Snider, 2014)            |
| <i>Piscirickettsia salmonis</i>  | Mix         | Assembly integration        | 454, Illumina and Ion Torrent   | (Yañez <i>et al.</i> , 2014)         |
| <i>Cupriavidus</i> sp.           | Mix         | Assembly integration        | Illumina                        | (Vilo <i>et al.</i> , 2014)          |
| <i>Coxiella burnetii</i>         | GAM-NGS     | Assembly integration        | Illumina                        | (Walter <i>et al.</i> , 2014)        |
| <i>Saccharomyces cerevisiae</i>  | Zorro       | Assembly integration        | Illumina and 454                | (Argueso <i>et al.</i> , 2009)       |
| <i>Vibrio campbellii</i>         | GapFiller   | Gap-closing                 | Illumina                        | (Gan <i>et al.</i> , 2015)           |
| <i>Clostridium beijerinckii</i>  | GapFiller   | Gap-closing                 | Illumina                        | (Little <i>et al.</i> , 2015)        |
| Equid Herpesviruses              | GapFiller   | Gap-closing                 | Illumina                        | (Wilkie <i>et al.</i> , 2015)        |
| <i>Plasmodium reichenowi</i>     | IMAGE       | Gap-closing                 | Illumina                        | (Otto <i>et al.</i> , 2014)          |
| <i>Plasmodium gaboni</i>         | IMAGE       | Gap-closing                 | Illumina                        | (Otto <i>et al.</i> , 2014)          |

| Organism                               | Tool   | Tool Category       | Sequencing Platform           | Reference                          |
|----------------------------------------|--------|---------------------|-------------------------------|------------------------------------|
| <i>Xanthomonas fagariae</i>            | IMAGE  | Gap-closing         | Illumina                      | (Vandroemme <i>et al.</i> , 2013)  |
| <i>Bacillus thuringiensis</i>          | IMAGE  | Gap-closing         | Illumina and 454              | (Iatsenko <i>et al.</i> , 2014)    |
| <i>Weissella ceti</i>                  | FGAP   | Gap-closing         | Ion Torrent                   | (Figueiredo <i>et al.</i> , 2014)  |
| <i>Lactococcus lactis</i>              | FGAP   | Gap-closing         | Ion Torrent                   | (Oliveira <i>et al.</i> , 2014)    |
| Ranavirus                              | iCORN  | Assembly correction | Illumina                      | (van Beurden <i>et al.</i> , 2014) |
| <i>Babesia divergens</i>               | iCORN  | Assembly correction | Illumina, 454 and PacBio SMRT | (Cuesta <i>et al.</i> , 2014)      |
| <i>Burkholderia pseudomallei</i>       | iCORN  | Assembly correction | Illumina                      | (Sahl <i>et al.</i> , 2013)        |
| <i>Klebsiella pneumonia</i>            | iCORN  | Assembly correction | Illumina and 454              | (Fookes <i>et al.</i> , 2013)      |
| <i>Ornithobacterium rhinotracheale</i> | SEQuel | Assembly correction | Illumina and 454              | (Zehr <i>et al.</i> , 2014)        |
| <i>Lichtheimia ramosa</i>              | SEQuel | Assembly correction | Illumina and 454              | (Linde <i>et al.</i> , 2014)       |

## References

- Adam Z, Chen Q, Xu R, Diange AE, Bromfield ESP and Tambong JT (2015) Draft genome sequence of *Pseudomonas simiae* Strain 2-36, an *in vitro* antagonist of *Rhizoctonia solani* and *Gaeumannomyces graminis*. *Genome Announc* 3:e01534-14.
- Argueso JL, Carazzolle MF, Mieczkowski PA, Duarte FM, Netto OVC, Missawa SK, Galzerani F, Costa GGL, Vidal RO, Noronha MF, *et al.* (2009) Genome structure of a *Saccharomyces cerevisiae* strain widely used in bioethanol production. *Genome Res* 19:2258-2270.
- Batista TM, Marques ETA, Franco GR and Douradinha B (2014) Draft Genome Sequence of the Probiotic Yeast *Saccharomyces cerevisiae* var. *boulardii* Strain ATCC MYA-796. *Genome Announc* 2:e01345-14.
- Benevides L de J, Viana MVC, Mariano DCB, Rocha F de S, Bagano PC, Folador EL, Pereira FL, Dorella FA, Leal CAG, Carvalho AF, *et al.* (2015) Genome sequence of *Corynebacterium ulcerans* Strain FRC11. *Genome Announc* 3:e00112-15.
- Bumgardner EA, Kittichotirat W, Bumgarner RE and Lawrence PK (2015) Comparative genomic analysis of seven *Mycoplasma hyosynoviae* strains. *Microbiologyopen* 4:343-359.
- Centeno-Leija S, Vinuesa P, Rodríguez-Peña K, Trenado-Uribe M, Cárdenas-Conejo Y, Serrano-Posada H, Rodríguez-Sanoja R and Sánchez S (2016) Draft genome sequence of an endophytic *Actinoplanes* species, encoding uncommon trans-acyltransferase polyketide synthases. *Genome Announc* 4:e00164-1.
- Cuesta I, González LM, Estrada K, Grande R, Zaballos A, Lobo CA, Barrera J, Sanchez-Flores A and Montero E (2014) High-quality draft genome sequence of *Babesia divergens*, the etiological agent of cattle and human babesiosis. *Genome Announc* 2:e01194-14.
- de Jong A, van Heel AJ, Montalban-Lopez M, Krawczyk AO, Berendsen EM, Wells-Bennik M and Kuipers OP (2015) Draft genome sequences of five spore-forming food isolates of *Bacillus pumilus*. *Genome Announc* 3:e01539-14.
- de Souza R, Sant'Anna FH, Ambrosini A, Tadra-Sfeir M, Faoro H, Pedrosa FO, Souza EM and Passaglia LMP (2015) Genome of *Rhizobium* sp.

UR51a, isolated from rice cropped in southern Brazilian fields. *Genome Announc* 3:e00249-15.

- Fauvart M, Sánchez-Rodríguez A, Beullens S, Marchal K and Michiels J (2011) Genome sequence of *Rhizobium etli* CNPAF512, a nitrogen-fixing symbiont isolated from bean root nodules in Brazil. *J Bacteriol* 193:3158-3159.
- Figueiredo HCP, Leal CAG, Dorella FA, Carvalho AF, Soares SC, Pereira FL and Azevedo VAC (2014) Complete genome sequences of fish *Pathogenic Weissella ceti* Strains WS74 and WS105. *Genome Announc* 2:e01014-14.
- Fiore MF, Alvarenga DO, Varani AM, Hoff-Rissetti C, Crespim E, Ramos RTJ, Silva A, Schaker PDC, Heck K, Rigonato J, *et al.* (2013) Draft genome sequence of the Brazilian toxic bloom-forming Cyanobacterium *Microcystis aeruginosa* Strain SPC777. *Genome Announc* 1:e00547-13.
- Fookes M, Yu J, De Majumdar S, Thomson N and Schneiders T (2013) Genome sequence of *Klebsiella pneumoniae* Ecl8, a reference strain for targeted genetic manipulation. *Genome Announc* 1:e00027-12.
- Galia W, Mariani-Kurkdjian P, Loukiadis E, Blanquet-Diot S, Leriche F, Brugère H, Shima A, Oswald E, Cournoyer B and Thevenot-Sergentet D (2015) Genome sequence and annotation of a human infection isolate of *Escherichia coli* O26:H11 involved in a raw milk cheese outbreak. *Genome Announc* 3:e01568-14.
- Gan HY, Noor MEM, Saari NA, Musa N, Mustapha B, Usup G and Danish-Daniel M (2015) Genome sequence of *Vibrio campbellii* Strain UMTGB204, a marine bacterium isolated from a green barrel tunicate. *Genome Announc* 3:e00210-15.
- Giampetruzzi A, Chiumenti M, Saponari M, Donvito G, Italiano A, Loconsole G, Boscia D, Cariddi C, Martelli GP and Saldarelli P (2015) Draft genome sequence of the *Xylella fastidiosa* CoDiRO Strain. *Genome Announc* 3:e01538-14.
- Harvey ZH and Snider MJ (2014) Draft genome sequence of the nicotinate-metabolizing soil bacterium *Bacillus niacini* DSM 2923. *Genome Announc* 2:e01251-14.
- Iatsenko I, Corton C, Pickard DJ, Dougan G and Sommer RJ (2014) Draft genome sequence of highly nematocidal *Bacillus thuringiensis* DB27. *Genome Announc* 2:e00101-14.
- Ledwaba B, Mafofo J and van Heerden H (2014) Genome sequences of *Brucella abortus* and *Brucella suis* strains isolated from bovine in Zimbabwe. *Genome Announc* 2:e01063-14.
- Linde J, Schwartze V, Binder U, Lass-Flörl C, Voigt K and Horn F (2014) *De novo* whole-genome sequence and genome annotation of *Lichtheimia ramosa*. *Genome Announc* 2:e00888-14.
- Little GT, Winzer K and Minton NP (2015) Genome sequence of the solvent-producing *Clostridium beijerinckii* Strain 59B, isolated from Staffordshire garden soil. *Genome Announc* 2:e00108-15.
- Lo R, Stanton-Cook MJ, Beatson SA, Turner MS and Bansal N (2015) Draft genome sequence of *Pseudomonas fluorescens* SRM1, an isolate from spoiled raw milk. *Genome Announc* 3:e00138-15.

- Lysøe E, Harris LJ, Walkowiak S, Subramaniam R, Divon HH, Riiser ES, Llorens C, Gabaldón T, Kistler HC, Jonkers W, *et al.* (2014) The genome of the generalist plant pathogen *Fusarium avenaceum* is enriched with genes involved in redox, signaling and secondary metabolism. *PLoS One* 9:e112703.
- Miller RR, Hird TJ, Tang P and Zlosnik JEA (2015) Whole-genome sequencing of three clonal clinical isolates of *B. cenocepacia* from a patient with cystic fibrosis. *PLoS One* 10:e0143472.
- Neri A, Fazio C, Ciammaruconi A, Anselmo A, Fortunato A, Palozzi A, Vacca P, Fillo S, Lista F and Stefanelli P (2014) Draft genome sequence of C:P1.5-1,10-8:F3-6:ST-11 meningococcal clinical isolate associated with a cluster on a cruise ship. *Genome Announc* 2:e01263-14.
- Oliveira LC, Saraiva TDL, Soares SC, Ramos RTJ, Sá PHCG, Carneiro AR, Miranda F, Freire M, Renan W, de Oliveira Júnior AFO, *et al.* (2014) Genome sequence of *Lactococcus lactis* subsp. *lactis* NCDO 2118, a GABA-producing strain. *Genome Announc* 2:e00980-14.
- Otto TD, Rayner JC, Böhme U, Pain A, Spottiswoode N, Sanders M, Quail M, Ollomo B, Renaud F, Thomas AW, *et al.* (2014) Genome sequencing of chimpanzee malaria parasites reveals possible pathways of adaptation to human hosts. *Nat Commun* 5:4754.
- Presta L, Bosi e, Fondi M, Maida I, Perrin E, Miceli E, Maggini V, Bogani P, Firenzuoli, Di Pilato V, *et al.* (2016) Draft genome sequence of *Pseudomonas* sp. EpS/L25, isolated from the medicinal plant *Echinacea purpurea* and able to synthesize antimicrobial compounds. *Genome Announc* 4: e00346-16.
- Rice P, Longden I and Bleasby A (2000) EMBOSS: The European Molecular Biology Open Software Suite. *Trends Genet* 16:276-277.
- Riedel T, Fiebig A, Göker M and Klenk H-P (2014) Complete genome sequence of the bacteriochlorophyll a-containing *Roseibacterium elongatum* type strain (DSM 19469(T)), a representative of the Roseobacter group isolated from Australian coast sand. *Stand Genomic Sci* 9:840-854.
- Sahl JW, Stone JK, Gelhaus HC, Warren RL, Cruttwell CJ, Funnell SG, Keim P and Tuanyok A (2013) Genome sequence of *Burkholderia pseudomallei* NCTC 13392. *Genome Announc* 1:e00183-13.
- Sharma A, Hira P, Shakarad M and Lal R (2014) Draft genome sequence of *Cellulosimicrobium* sp. Strain MM, isolated from arsenic-rich microbial mats of a Himalayan hot spring. *Genome Announc* 2:e01020-14.
- Stafford GP, Chaudhuri RR, Haraszthy V, Friedrich V, Schäffer C, Ruscitto A, Honma K and Sharma A (2016) Draft genome sequences of three clinical isolates of *Tannerella forsythia* isolated from subgingival plaque from periodontitis patients in the United States. *Genome Announc* 4: e01286-16.
- Tweedy J, Spyrou MA, Donaldson CD, Depledge D, Breuer J and Gompels UA (2015) Complete genome sequence of the Human Herpesvirus 6A Strain AJ from Africa resembles strain GS from North America. *Genome Announc* 3:e01498-14.
- van Beurden SJ, Hughes J, Saucedo B, Rijks J, Kik M, Haenen OLM, Engelsma MY, Gröne A, Verheije MH and Wilkie G (2014) Complete genome sequence of a Common Midwife Toad virus-like Ranavirus associated with mass mortalities in wild amphibians in the Netherlands. *Genome Announc* 2:e01293-14.

- Vandroemme J, Cottyn B, Baeyen S, De Vos P and Maes M (2013) Draft genome sequence of *Xanthomonas fragariae* reveals reductive evolution and distinct virulence-related gene content. *BMC Genomics* 14:829.
- Varani AM, Lemos MVF, Fernandes CC, Lemos EGM, Alves ECC and Desidério JA (2013) Draft genome sequence of *Bacillus thuringiensis* var. *thuringiensis* Strain T01-328, a Brazilian isolate that produces a soluble pesticide protein, Cry1Ia. *Genome Announc* 1:e00817-13.
- Vilo C, Benedik MJ, Ilori M and Dong Q (2014) Draft genome sequence of *Cupriavidus* sp. Strain SK-4, a di-ortho-substituted biphenyl-utilizing bacterium isolated from polychlorinated biphenyl-contaminated sludge. *Genome Announc* 2:e00474-14.
- Walter MC, Öhrman C, Myrtenäs K, Sjödin A, Byström M, Larsson P, Macellaro A, Forsman M and Frangoulidis D (2014) Genome sequence of *Coxiella burnetii* strain Namibia. *Stand Genomic Sci* 9:22.
- Wilkie GS, Kerr K, Stewart JP, Studdert MJ and Davison AJ (2015) Genome sequences of equid herpesviruses 2 and 5. *Genome Announc* 3:e00119-15.
- Yañez AJ, Molina C, Haro RE, Sanchez P, Isla A, Mendoza J, Rojas-Herrera M, Trombert A, Silva AX, Cárcamo JG, *et al.* (2014) Draft genome sequence of virulent strain AUSTRAL-005 of *Piscirickettsia salmonis*, the etiological agent of Piscirickettsiosis. *Genome Announc* 2:e00990-14.
- Zehr ES, Bayles DO, Boatwright WD, Tabatabai LB and Register KB (2014) Complete genome sequence of *Ornithobacterium rhinotracheale* strain ORT-UMN 88. *Stand Genomic Sci* 9:16.
